# Supplementary material for: Protocol for a comprehensive prospective cohort study of trio-based whole-genome sequencing for underlying cancer predisposition in paediatric and adolescent patients newly diagnosed with cancer: the PREDICT study
Source: HighWire-hosted journal article supplement (doi:10.1136/bmjopen-2022-070082), 2023-05-01
Supplement: bmjopen-2022-070082supp005_data_supplement.pdf [file bmjopen-2022-070082supp005_data_supplement.pdf]

Supplemental material

**APPENDIX 5: Virtual gene panel for WGS analysis and interpretation**

|         |          |         |         |
|---------|----------|---------|---------|
| ACD     | EXT2     | NHP2    | RPS28   |
| AIP     | FAAP100  | NOP10   | RPS29   |
| ALK     | FANCA    | NRAS    | RPS7    |
| ANKRD26 | FANCB    | NSD1    | RTEL1   |
| APC     | FANCC    | NTHL1   | RUNX1   |
| ATM     | FANCD2   | PALB2   | SAMD9   |
| AXIN2   | FANCE    | PARN    | SAMD9L  |
| BAP1    | FANCF    | PAX5    | SBDS    |
| BARD1   | FANCG    | PDGFRA  | SDHA    |
| BLM     | FANCI    | PHOX2B  | SDHAF2  |
| BMPR1A  | FANCL    | PMS2    | SDHB    |
| BRAF    | FANCM    | POLD1   | SDHC    |
| BRCA1   | FAS      | POLE    | SDHD    |
| BRCA2   | FGFR2    | POT1    | SETBP1  |
| BRIP1   | FH       | PRF1    | SH2B3   |
| BUB1B   | FLCN     | PRKAR1A | SHOC2   |
| CBL     | GATA1    | PTCH1   | SLX4    |
| CDC73   | GATA2    | PTEN    | SMAD4   |
| CDH1    | GPC3     | PTPN11  | SMARCA4 |
| CDK4    | GPR161   | RAD51   | SMARCB1 |
| CDKN1B  | GREM1    | RAD51C  | SMARCE1 |
| CDKN1C  | HAVCR2   | RAD51D  | SOS1    |
| CDKN2A  | HAX1     | RAF1    | SPRED1  |
| CEBPA   | HOXB13   | RB1     | SPRTN   |
| CHEK2   | HRAS     | RECQL4  | SRP72   |
| CREBBP  | IKZF1    | REST    | STAT3   |
| CTC1    | KCNQ1OT1 | RET     | STK11   |
| CTR9    | KIT      | RFWD3   | STN1    |
| CXCR4   | KRAS     | RHBDF2  | SUFU    |
| CYLD    | LZTR1    | RIT1    | TERC    |
| DDB2    | MAD2L2   | RMRP    | TERT    |
| DDX41   | MAP2K1   | RPL11   | TINF2   |
| DICER1  | MAP2K2   | RPL15   | TMEM127 |
| DIS3L2  | MAX      | RPL23   | TP53    |
| DKC1    | MBD4     | RPL26   | TRIM28  |
| EGFR    | MEN1     | RPL27   | TSC1    |
| ELANE   | MET      | RPL31   | TSC2    |
| ELP1    | MITF     | RPL35A  | TSR2    |
| ENG     | MLH1     | RPL36   | UBE2T   |
| EP300   | MPL      | RPL5    | VHL     |
| EPCAM   | MSH2     | RPS10   | WAS     |
| ERCC1   | MSH6     | RPS15   | WRAP53  |
| ERCC2   | MTAP     | RPS17   | WRN     |
| ERCC3   | MUTYH    | RPS19   | WT1     |
| ERCC4   | NAF1     | RPS24   | XPA     |
| ERCC5   | NBN      | RPS26   | XPC     |
| ETV6    | NF1      | RPS27   | XRCC2   |
| EXT1    | NF2      | RPS27A  |         |

PREDICT Protocol\_Appendix 5
